# Supplementary material for: Effect of synthesis temperature on the structural defects of integrated spinel-layered Li1.2Mn0.75Ni0.25O2+δ: a strategy to develop high-capacity cathode materials for Li-ion batteries
Source: Royal Society of Chemistry journal article supplement (doi:10.1039/c7ta04002d), 2017-01-01
Supplement: c7ta04002d1.pdf [file c7ta04002d1.pdf]

# **Effects of synthesis temperature on structural defects of integrated spinel-layered $\text{Li}_{1.2}\text{Mn}_{0.75}\text{Ni}_{0.25}\text{O}_{2+\delta}$ : A strategy to develop high capacity cathode material for Li-ion batteries**

Ngoc Hung Vu<sup>a</sup>, Paulraj Arunkumar<sup>a</sup>, Jong Chan Im<sup>a</sup>, Duc Tung Ngo<sup>a</sup>, Hang T. T. Le<sup>a,b</sup>, Chan-Jin Park<sup>a</sup>, and Won Bin Im<sup>a,\*</sup>

*<sup>a</sup>School of Materials Science and Engineering and Optoelectronics Convergence Research Center, Chonnam National University, 77 Yongbong-ro, Buk-gu, Gwangju 61186, Republic of Korea*

*<sup>b</sup>School of Chemical Engineering, Hanoi University of Science and Technology, 1<sup>st</sup> Dai Co Viet, Hai Ba Trung, Hanoi, Vietnam*

\*To whom correspondence should be addressed

Tel : +82-62-530-1715

Fax : +82-62-530-1699

E-mail: imwonbin@jnu.ac.kr

Table S1. Refined site occupancy for Li<sub>2</sub>MnO<sub>3</sub>-like (space group: *C2/m*).

| atom   | site       | occupancy |      |       |
|--------|------------|-----------|------|-------|
|        |            | S650      | S750 | S850  |
| Li (1) | 2 <i>b</i> | 0.6       | 0.7  | 0.78  |
| Mn (1) | 2 <i>b</i> | 0.2       | 0.12 | 0.13  |
| Ni (1) | 2 <i>b</i> | 0.2       | 0.18 | 0.09  |
| Li (2) | 2 <i>c</i> | 1         | 1    | 1     |
| Li (3) | 4 <i>h</i> | 1         | 1    | 1     |
| Mn (2) | 4 <i>g</i> | 0.85      | 0.89 | 0.895 |
| Ni (2) | 4 <i>g</i> | 0.11      | 0.06 | 0.045 |
| Li (4) | 4 <i>g</i> | 0.15      | 0.1  | 0.06  |
| O (1)  | 4 <i>i</i> | 1         | 1    | 1     |
| O (2)  | 8 <i>j</i> | 1         | 1    | 1     |

Table S2. Surface area of S650, S750, and S850 obtained by BET method.

| sample | surface area (m <sup>2</sup> g <sup>-1</sup> ) |
|--------|------------------------------------------------|
| S650   | 18.866                                         |
| S750   | 1.4623                                         |
| S850   | 0.6905                                         |

The Li<sup>+</sup> diffusion coefficients of all samples were calculated using the following equation<sup>1</sup> and given in Table S3.

$$D = R^2 T^2 / 2 A n^4 F^4 C^2 \sigma^2 \quad (1)$$

where  $R$  is the gas constant,  $T$  is the absolute temperature,  $A$  is the surface area of the cathode,  $n$  is the number of electrons transferred in the half-reaction for the redox couple,  $F$  is the Faraday constant,  $C$  is the concentration of Li ion in solid,  $D$  is the diffusion coefficient (cm<sup>2</sup> s<sup>-1</sup>), and  $\sigma$  is the Warburg factor, which is relative to  $Z'$ .  $\sigma$  can be obtained from the slope of the lines in Figure S6.

$$Z' = R_D + R_L + \sigma \omega^{-1/2} \quad (2)$$

Table S3. Warburg factor and diffusion coefficient of three samples.

| sample | $\sigma$ | $D_{\text{Li}^+}$ (cm <sup>2</sup> s <sup>-1</sup> ) |
|--------|----------|------------------------------------------------------|
| S650   | 10.989   | $5.11 \times 10^{-11}$                               |
| S750   | 6.466    | $1.48 \times 10^{-10}$                               |
| S850   | 5.303    | $2.19 \times 10^{-10}$                               |

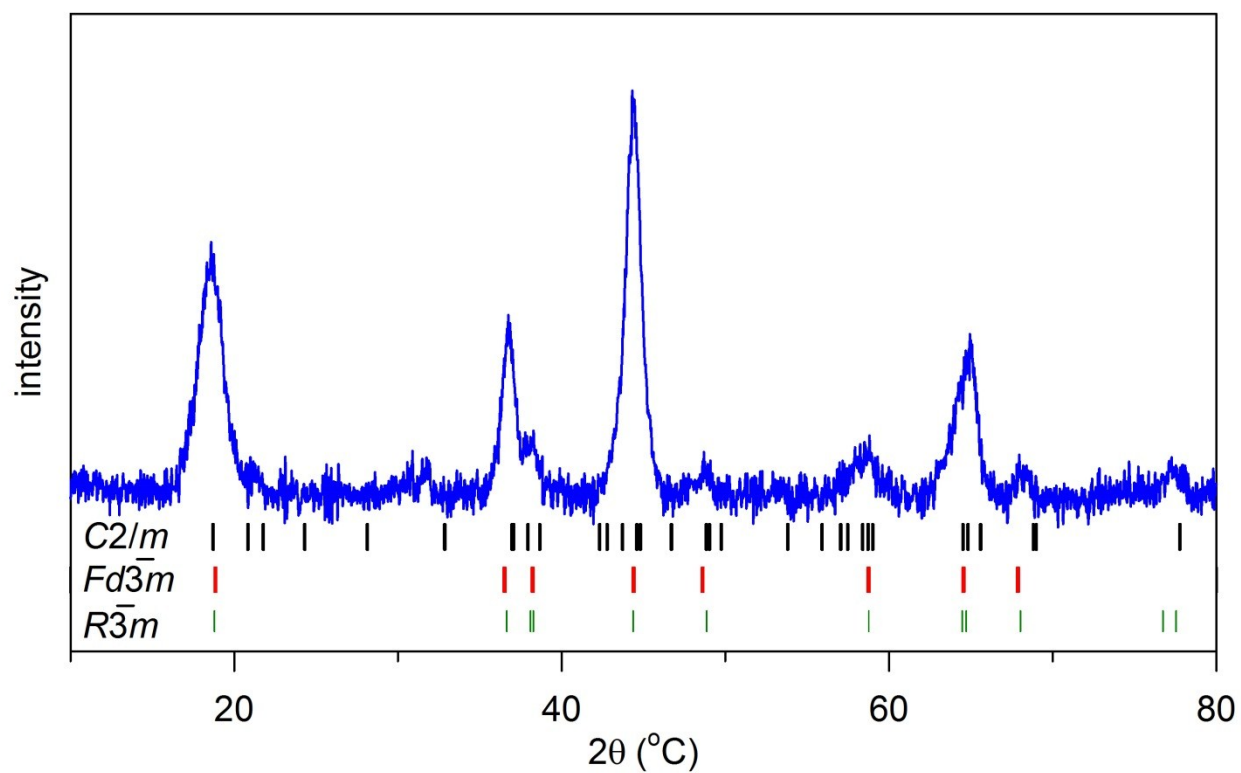

Figure S1. XRD pattern of intermediate product after hydrothermal reaction. The standards marked with  $C2/m$  (ICDD entry number 01-084-1634),  $Fd\bar{3}m$  (ICDD entry number 01-080-2162), and  $R\bar{3}m$  (PDF#09-0063) show the peaks corresponding to  $\text{Li}_2\text{MnO}_3$ ,  $\text{LiMn}_{1.5}\text{Ni}_{0.5}\text{O}_4$ , and  $\text{LiNi}_{0.5}\text{Mn}_{0.5}\text{O}_2$ , respectively.

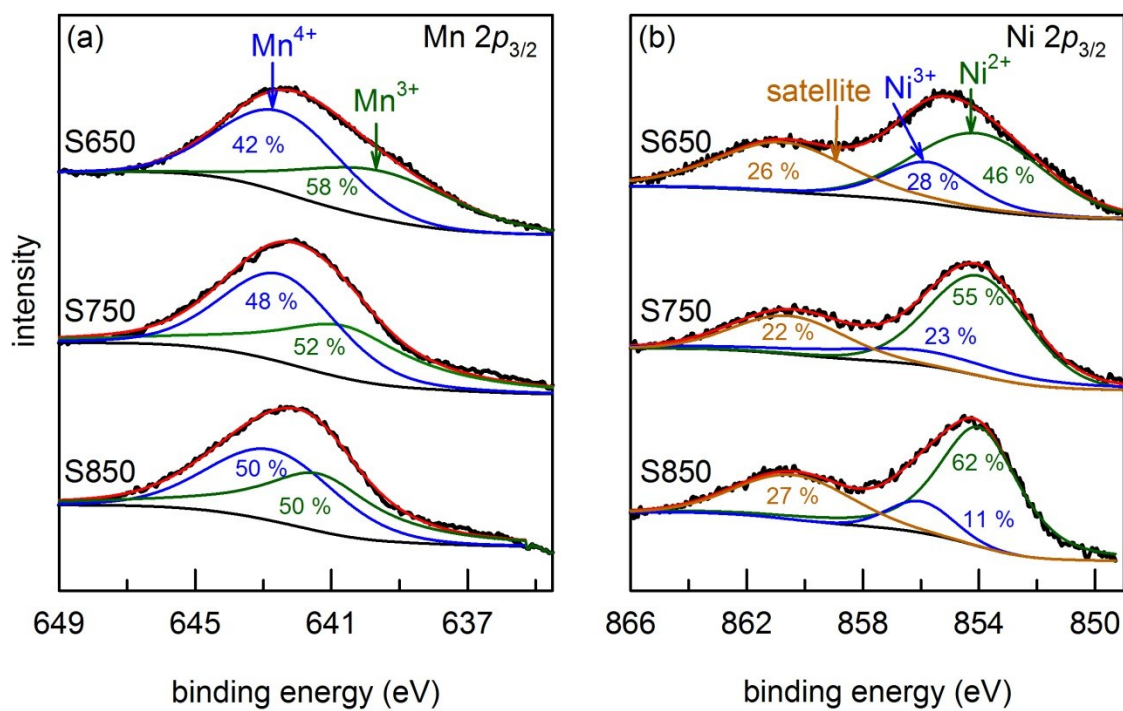

Figure S2. XPS spectra of (a) Mn 2p<sub>3/2</sub> and (b) Ni 2p<sub>3/2</sub> with signal deconvolution and assignment to the indicated ions of S650, S750, and S850.

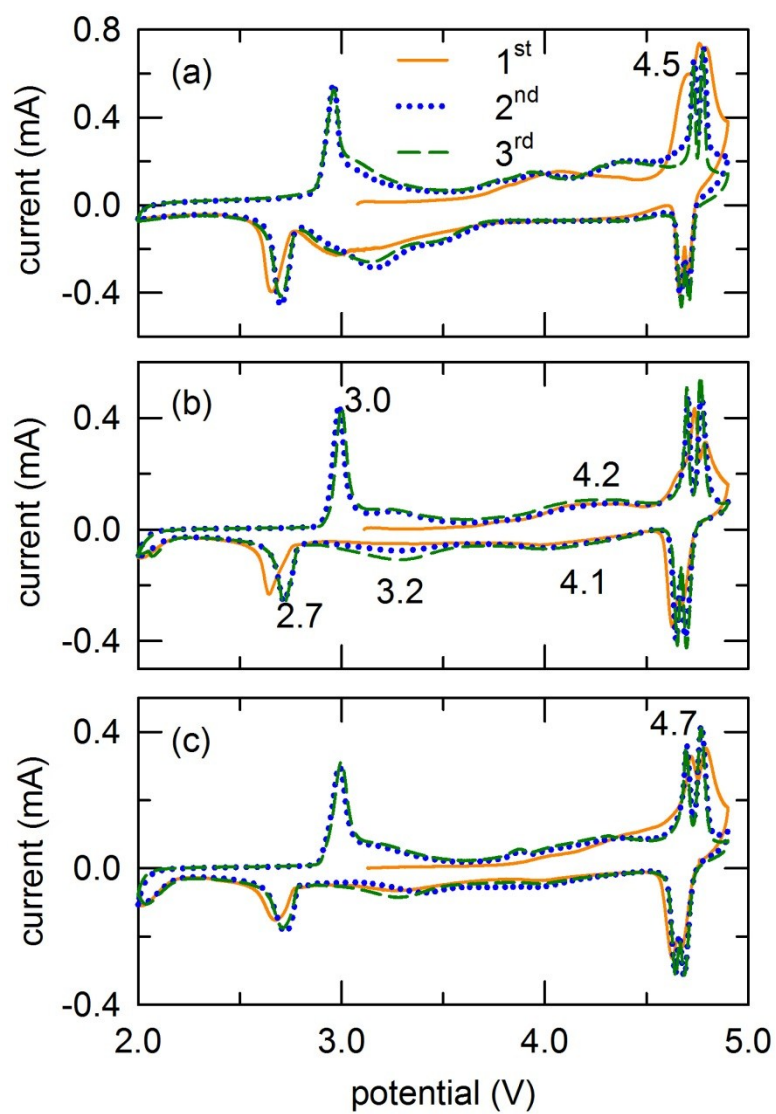

Figure S3. Cyclic voltammograms of (a) S650, (b) S750, and (c) S850 in the potential window of 2.0–4.9 V at a scan rate of 0.05 mVs<sup>-1</sup>.

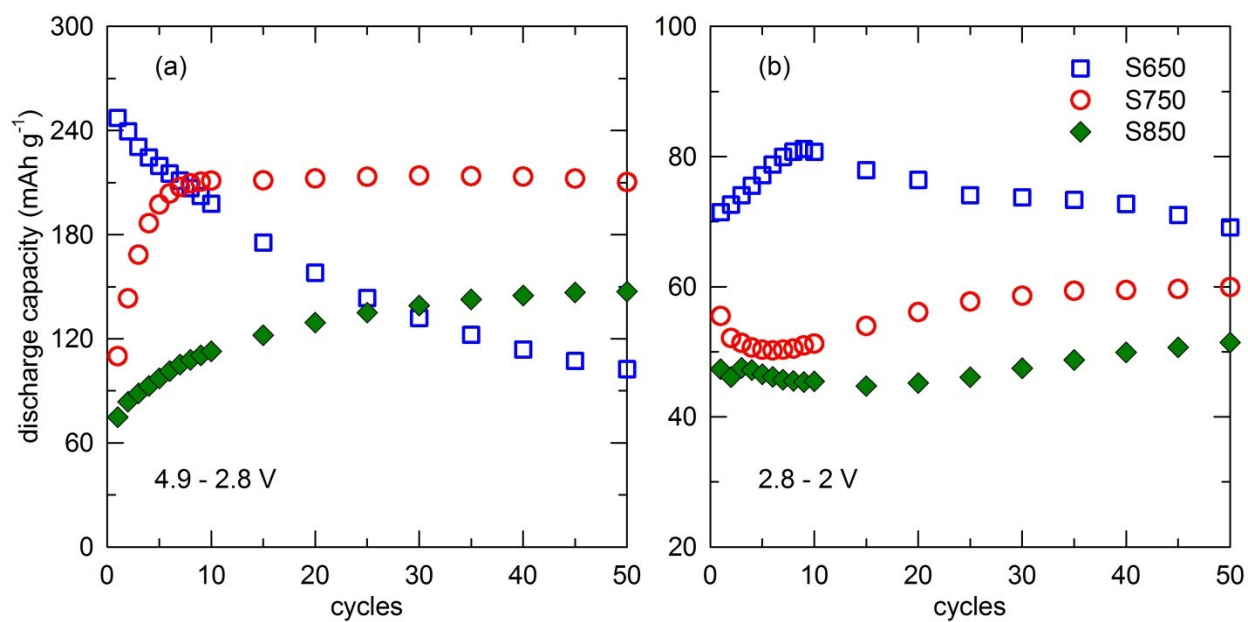

Figure S4. Net discharge capacities in the voltage range of (a) 4.9 – 2.8 V and (b) 2.8 – 2 V of S650, S750, and S850 samples in the first 50 cycles at C/20.

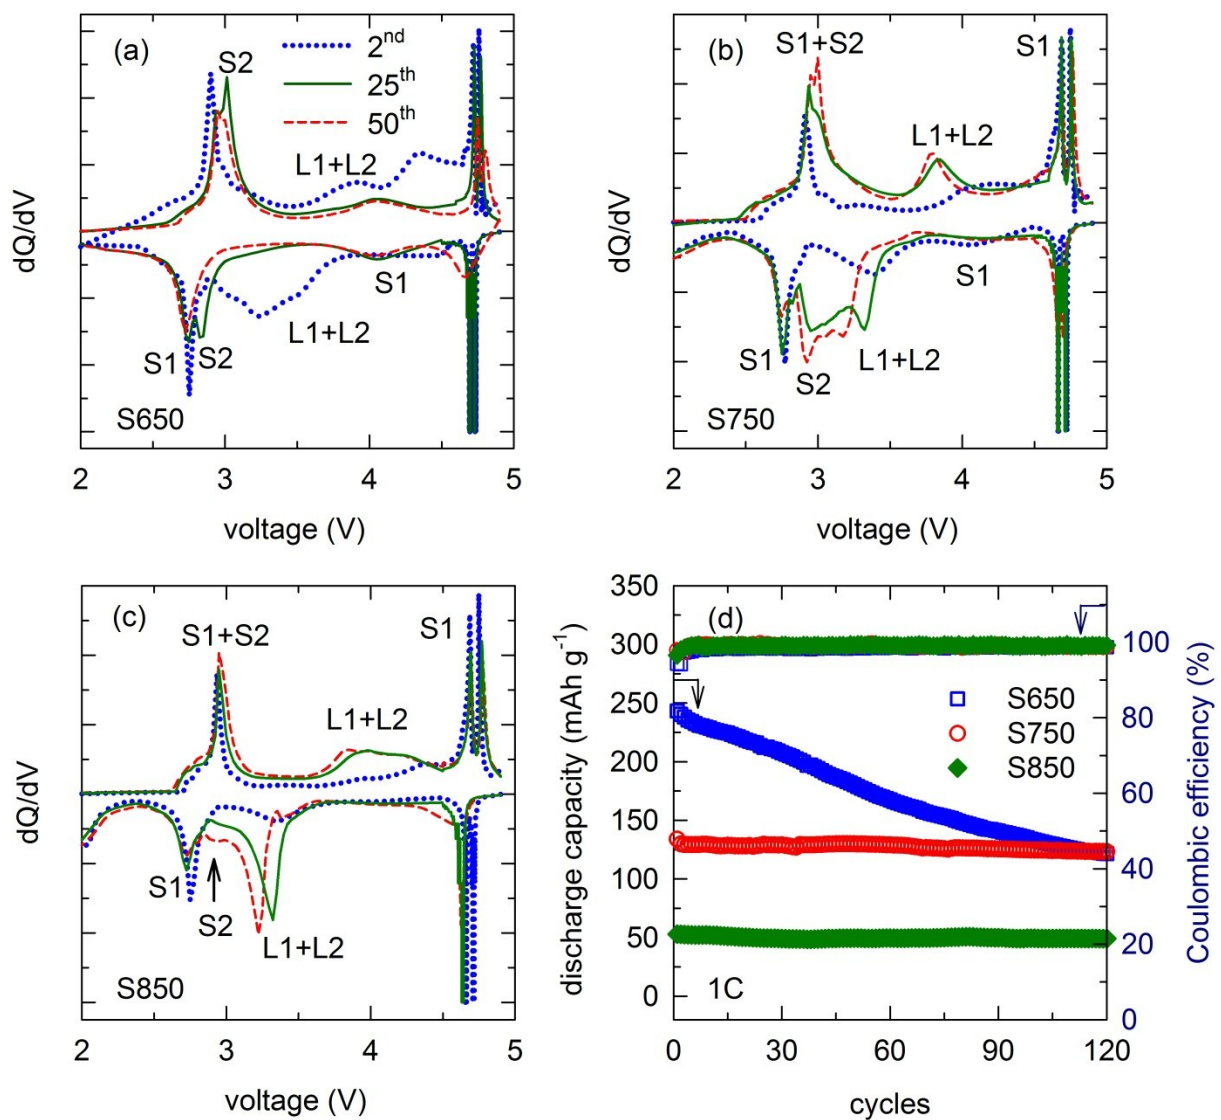

Figure S5. dQ/dV plots of (a) S650, (b) S750, and (c) S850, at C/20 over a 2.0–4.9 V voltage window for the 2<sup>nd</sup>, 25<sup>th</sup>, and 50<sup>th</sup> cycles. S1, S2, L1, and L2 stand for  $\text{LiMn}_{1.5}\text{Ni}_{0.5}\text{O}_4$ , the new spinel phase,  $\text{Li}_2\text{MnO}_3$ , and  $\text{LiNi}_{0.5}\text{Mn}_{0.5}\text{O}_2$ , respectively. (d) Cycling stability curves of the S650, S750, and S850 samples at 1C over a 2.0–4.8 V voltage window.



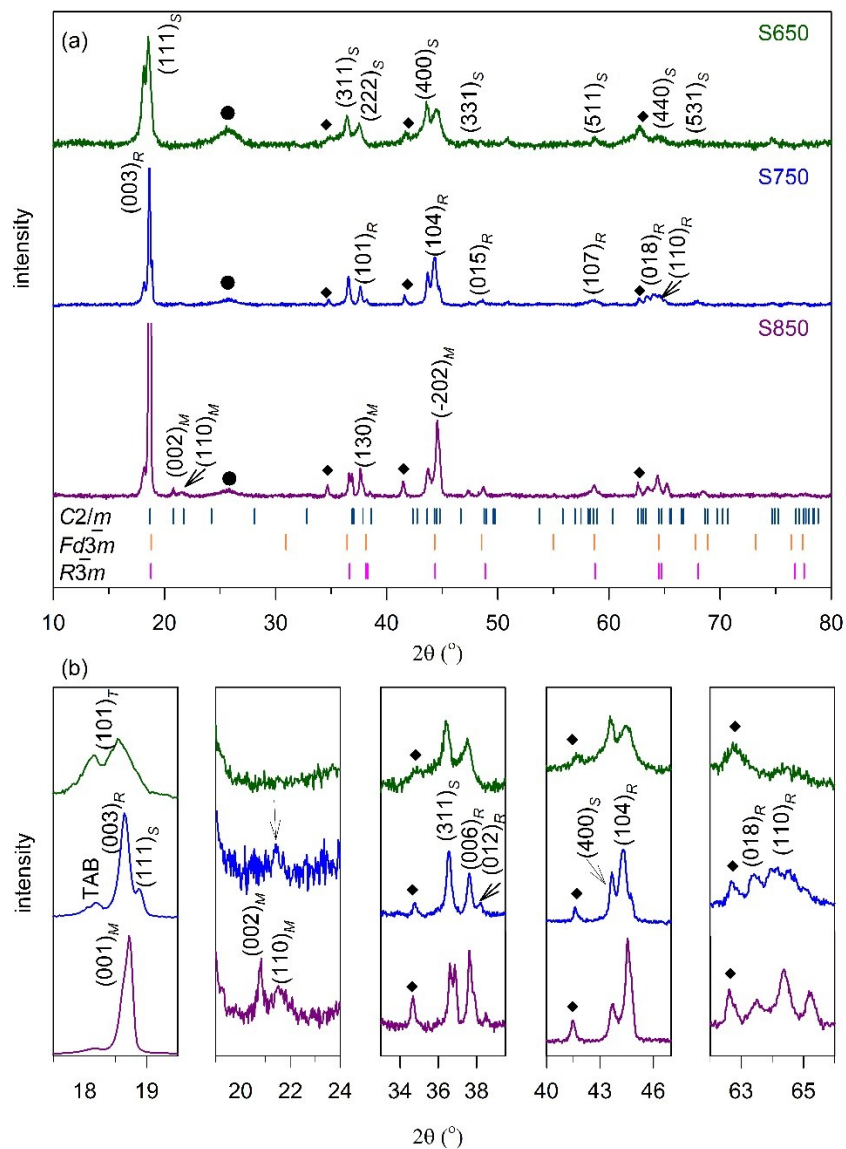

Figure S6. (a) X-ray patterns of S650, S750, and S850 after 50 cycles. The standard marked with  $C2/m$  (ICDD entry number 01-084-1634),  $Fd\bar{3}m$  (ICDD entry number 01-080-2162), and  $R\bar{3}m$  (PDF#09-0063) showed the peak positions correspond to  $\text{Li}_2\text{MnO}_3$ ,  $\text{LiMn}_{1.5}\text{Ni}_{0.5}\text{O}_4$  and  $\text{LiMn}_{0.5}\text{Ni}_{0.5}\text{O}_2$  components, respectively. (b) Selected  $2\theta$  region of XRD patterns for the S650, S750, and S850. The impurity phase of carbon and tetragonal phase were marked with “●” and “◆”, respectively.  $M$ ,  $S$ ,  $R$ , and  $T$  represent for monoclinic, spinel, rhombohedral, and tetragonal, respectively.

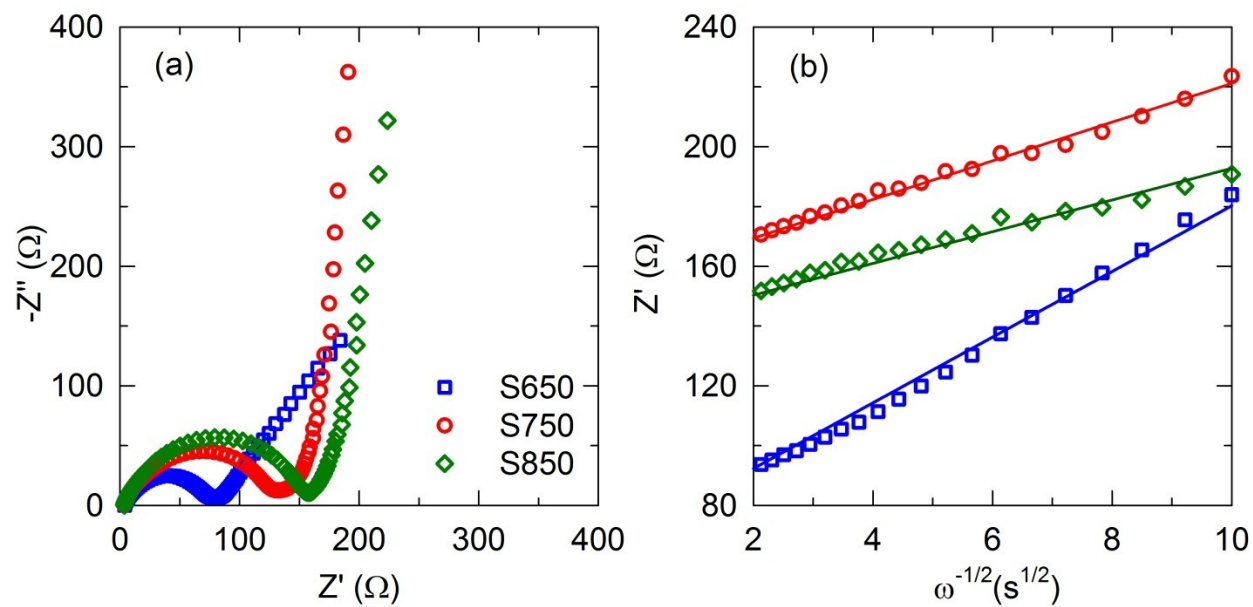

Figure S7. (a) EIS and (b) Real parts of the complex impedance versus  $\omega^{-1/2}$  of the S650, S750, and S850 before cycling.

## References

1. S.L. Chou, J.Z. Wang, H.K. Liu and S.X. Dou, *J. Phys. Chem. C.*, 2011, **115**, 16220-16227.
